# Supplementary material
Source: PubMed Central journal article supplement (PMC3885979)
Supplement: NIHMS539682-supplement-1_si_001.pdf [file NIHMS539682-supplement-1_si_001.pdf]

Supporting Information for Carignan et al., 2013

“Flame Retardant Exposure among Collegiate U.S. Gymnasts”

*Courtney C. Carignan\**, *Wendy Heiger-Bernays*, *Michael D. McClean*,  
*Simon C. Roberts*, *Andreas Sjödin*, *Heather M. Stapleton*, *Thomas F. Webster*

6 pages, 4 tables and 2 figures

### **Surface wipes.**

**Methods.** In Gym 1 we collected one surface wipe from each of the four gymnastics apparatus: the top of the vaulting horse, mats beneath the beam and uneven bars, and a mat on the floor exercise area. We also collected a surface wipe from two dusty spaces in the gym: a mat on the far edge of the loose foam pit and from the edge of a mat on the opposite side of the gym. In Gym 2 we collected one surface wipe from a dusty space within 30 cm of the loose foam pit. For each sample, we soaked a 7.6 by 7.6-cm sterile gauze pad in 3 ml of isopropyl alcohol, wiped 232 cm<sup>2</sup> of the target surface, and placed the gauze in a clean glass vial. The vial was wrapped in foil and bubble-wrap, sealed in a polyethylene zip bag and stored at -20° C. One field blank was collected in the same manner, but without wiping a surface. Wipe samples were analyzed using GC/ECNI-MS as previously described by Stapleton et al. (2008) and with the modifications described for handwipes.

**Results.** We detected ΣPentaBDE, TBB and TBPH in all surface wipe samples (SI Table S3b). TDCPP and TCPP were detected in 60% of surface wipes collected from Gym 1. Both TPP and TDCPP were detected in the single surface wipe collected from Gym 2. TPP and TCPP were not measured in surface wipes from Gyms 1 and 2, respectively. PentaBDE was the dominant flame retardant in surface wipes collected from all sample locations in both Gym 1 and Gym 2. Median loadings of TBB and TBPH in surface wipes from Gym 1 were higher than in the single wipe sample from Gym 2.

**Table S1.** PBDEs (<50% detect), BB153, organochlorine pesticides and PCBs in gymnast serum.

| Analyte                                | Detection Frequency (%) | Maximum MDL (ng/g lipid) | GM (ng/g lipid) | Range (ng/ g lipid) |
|----------------------------------------|-------------------------|--------------------------|-----------------|---------------------|
| Polybrominated diphenyl ethers         |                         |                          |                 |                     |
| BDE-17                                 | 0                       | 2.2                      | NA              | <MDL                |
| BDE-66                                 | 0                       | 2.2                      | NA              | <MDL                |
| BDE-154                                | 45                      | 13.6                     | NR              | <MDL-6.8            |
| BDE-183                                | 0                       | 1.2                      | NA              | <MDL                |
| BDE-209                                | 0                       | 22.3 <sup>a</sup>        | NA              | <MDL                |
| Organochlorine pesticides              |                         |                          |                 |                     |
| hexachlorobenzene                      | 0                       | 20.2                     | NA              | <MDL                |
| $\beta$ -hexachlorocyclohexane         | 0                       | 11.1                     | NA              | <MDL                |
| $\gamma$ -hexachlorocyclohexane        | 0                       | 11.1                     | NA              | <MDL                |
| oxychlorane                            | 9                       | 11.1                     | NR              | <MDL-9.0            |
| <i>trans</i> -nonachlor                | 9                       | 11.1                     | NR              | <MDL-11.5           |
| <i>p,p'</i> -DDE                       | 100                     | 11.1                     | 56.8            | 26.5-89.1           |
| <i>o,p'</i> -DDT                       | 0                       | 11.1                     | NA              | <MDL                |
| <i>p,p'</i> -DDT                       | 0                       | 11.1                     | NA              | <MDL                |
| Mirex                                  | 0                       | 11.1                     | NA              | <MDL                |
| Polychlorinated biphenyls <sup>b</sup> |                         |                          |                 |                     |
| PCB 28                                 | 0                       | 3.0                      | NA              | <MDL                |
| PCB 74                                 | 82                      | 2.2                      | 2.1             | <MDL-7.6            |
| PCB 99                                 | 45                      | 2.2                      | NR              | <MDL-3.3            |
| PCB 118                                | 82                      | 2.2                      | 2.0             | <MDL-8.1            |
| PCB 138, 158                           | 91                      | 2.2                      | 3.0             | <MDL-20.9           |
| PCB 146                                | 9                       | 2.2                      | NR              | <MDL-6.5            |
| PCB 153                                | 100                     | 2.2                      | 5.3             | 2.0-45.4            |
| PCB 156                                | 36                      | 2.2                      | NR              | <MDL-14.4           |
| PCB 157                                | 9                       | 2.2                      | NR              | <MDL-3.7            |
| PCB 167                                | 9                       | 2.2                      | NR              | <MDL-2.5            |
| PCB 170                                | 55                      | 2.2                      | 1.66            | <MDL-11.9           |
| PCB 180                                | 100                     | 2.2                      | 3.6             | 1.2-27.3            |
| PCB 187                                | 18                      | 2.2                      | NR              | <MDL-6.1            |
| PCB 194                                | 27                      | 2.2                      | NR              | <MDL-3.4            |
| PCB 196, 203                           | 27                      | 2.2                      | NR              | <MDL-2.5            |
| PCB 199                                | 27                      | 2.2                      | NR              | <MDL-3.5            |

<sup>a</sup>The MDL was 22.3 in one sample and <14 ng/g lipid for the remaining samples.

<sup>b</sup>PCBs 44, 49, 52, 66, 87, 101, 105, 110, 128, 149, 151, 172, 177, 178, 183, 189, 195, 206 and 109 had detection frequencies of 0% and maximum MDLs of 2.2 ng/g lw.

MDL: Method detection limit

NA: Not applicable

NR: GM is not reported as detection frequency is <50%.

**Table S2.** Comparison of GM (95% confidence interval) concentrations of PentaBDEs and POPs in gymnast serum to other U.S. populations (ng/g lw).

|                        | Population: Office Workers <sup>1</sup> |                   | Pregnant Women <sup>2</sup> |                  | General U.S. <sup>3</sup>      |                  | U.S. Teenagers <sup>3</sup>   |                  | Californians <sup>4</sup> |                    | Gymnasts |      | Foam Recyclers and Carpet Installers <sup>5</sup> |       |
|------------------------|-----------------------------------------|-------------------|-----------------------------|------------------|--------------------------------|------------------|-------------------------------|------------------|---------------------------|--------------------|----------|------|---------------------------------------------------|-------|
|                        | Sample Size: (n=31)                     | 2009              | Sample Year: 2008-2010      | Age Range: 18-39 | 2003-2004                      | 12-85            | 2003-2004                     | 12-19            | 2003-2004                 | 12-60 <sup>a</sup> | 2012     | 2006 | 2006                                              | 22-56 |
| <b>PentaBDEs</b>       |                                         |                   |                             |                  |                                |                  |                               |                  |                           |                    |          |      |                                                   |       |
| BDE 28                 | 1.1 (0.7-1.5)                           | NR                | NR                          | NR               | 1.2 (1.0-1.4)                  | 1.3 (1.2-1.5)    | 2.1 (1.5-2.7)                 | 1.5 (0.9-2.4)    | 3.9 (2.4-6.3)*            |                    |          |      |                                                   |       |
| BDE 47                 | 14.2 (9.4-21.3)*                        | 16.5 (13.6-20.0)* | NR                          | NR               | 20.5 (17.6-23.9)*              | 28.2 (24.6-32.3) | 36.2 (25.0-47.4)              | 43.5 (26.8-70.5) | 91.7 (54.9-153)*          |                    |          |      |                                                   |       |
| BDE 85                 | NR                                      | NR                | NR                          | NR               | NR                             | NR               | NR                            | 1.4 (0.9-2.2)    | 2.7 (1.6-4.5)             |                    |          |      |                                                   |       |
| BDE 99                 | 2.5 (1.6-3.7)*                          | 4.7 (3.7-5.9)     | 4.7 (3.7-5.9)               | NR               | <MDL                           | 6.9 (6.1-7.7)    | 7.4 (5.2-9.6)                 | 11.9 (4.0-20.4)  | 27.1 (15.8-46.4)*         |                    |          |      |                                                   |       |
| BDE 100                | 2.7 (1.7-4.3)*                          | 4.2 (3.5-5.0)*    | 4.2 (3.5-5.0)*              | NR               | 3.9 (3.4-4.5)*                 | 5.2 (4.5-6.0)*   | 6.0 (4.2-7.8)                 | 10.9 (6.8-17.4)  | 20.8 (12.7-34.0)          |                    |          |      |                                                   |       |
| BDE 153                | 5.0 (3.1-8.1)*                          | 5.9 (5.1-6.9)*    | 5.9 (5.1-6.9)*              | NR               | 5.7 (5.1-6.3)*                 | 8.1 (6.7-9.7)*   | 6.8 (5.2-8.4)*                | 32.5 (20.5-51.5) | 27.4 (18.4-40.9)          |                    |          |      |                                                   |       |
| ΣPentaBDE <sup>a</sup> | 28.3 (19.1-42.0)*                       | 36.6 <sup>b</sup> | 36.6 <sup>b</sup>           | NR               | 38.6 (33.5-43.7)* <sup>c</sup> | NA               | 62.0 (44.6-79.4) <sup>c</sup> | 109 (74.1-160)   | 178 (112-282)             |                    |          |      |                                                   |       |
| <b>Other POPs</b>      |                                         |                   |                             |                  |                                |                  |                               |                  |                           |                    |          |      |                                                   |       |
| DDE                    | NA                                      | NA                | NA                          | NA               | 238 (195-292)*                 | 105 (84.7-129)*  | NA                            | 56.8 (44.6-72.3) | NA                        |                    |          |      |                                                   |       |
| PCB 74                 | NA                                      | NA                | NA                          | NA               | 4.8 (4.6-5.0)*                 | 2.2 (2.0-2.4)    | NA                            | <MDL             | NA                        |                    |          |      |                                                   |       |
| PCB 118                | NA                                      | NA                | NA                          | NA               | 6.0 (5.5-6.5)*                 | 3.0 (2.8-3.4)    | NA                            | <MDL             | NA                        |                    |          |      |                                                   |       |
| PCB 138/158            | NA                                      | NA                | NA                          | NA               | 15 (14.1-16.1)*                | 5 (4.5-5.6)      | NA                            | 3.0 (1.6-5.5)    | NA                        |                    |          |      |                                                   |       |
| PCB 153                | NA                                      | NA                | NA                          | NA               | 19.8 (18.8-20.9)*              | 5.8 (5.3-6.6)    | NA                            | 5.3 (2.9-9.2)    | NA                        |                    |          |      |                                                   |       |
| PCB 170                | NA                                      | NA                | NA                          | NA               | 5.4 (5.2-5.7)*                 | 1.2 (0.97-1.3)   | NA                            | 1.7 (0.91-3.0)   | NA                        |                    |          |      |                                                   |       |
| PCB 180                | NA                                      | NA                | NA                          | NA               | 15 (14.5-15.7)*                | 3 (2.7-3.5)      | NA                            | 3.6 (1.9-6.8)    | NA                        |                    |          |      |                                                   |       |

\*GM is significantly different from GM of gymnasts at the α=0.05 level.

<sup>1</sup>Watkins et al. 2011; <sup>2</sup>Stapleton et al. 2011; <sup>3</sup>Sjodin et al. (2008) and Patterson et al. (2009); <sup>4</sup>Zota et al. (2008); <sup>5</sup>Stapleton et al. 2008.

<sup>a</sup>ΣPentaBDE=Sum(BDEs 28, 47, 99, 100, 153).

<sup>b</sup>Median value, 95% CI not reported.

<sup>c</sup>ΣPentaBDE=Sum(BDEs 28, 47, 99, 100, 153, 154).

NR: Not reported due to low detection frequency (<50%).

<MDL: Geometric mean is less than the method detection limit.

NA: Data not available.

**Table S3.** Flame retardants in gym dust collected using a) vacuum cleaner and b) surface wipe.

| a) Vacuumed      | Gym 1       |                   |             |             |                | Gym 2       |             |      |
|------------------|-------------|-------------------|-------------|-------------|----------------|-------------|-------------|------|
|                  | LFP, within | Beam <sup>1</sup> | Vault       | Uneven Bars | Floor Exercise | LFP, within | LFP, beside | VB   |
| PBDEs            |             |                   |             |             |                |             |             |      |
| BDE 28, 83       | 2.35        | 3.44              | 0.91        | 0.42        | 0.15           | 48.5        | 5.66        | 1.43 |
| BDE 47           | <i>169</i>  | <i>453</i>        | <i>98.8</i> | <i>88.3</i> | 20.4           | 390         | 247         | 146  |
| BDE 85, 155      | 23.1        | <i>50.3</i>       | 11.2        | 7.81        | 2.39           | 258         | 79.1        | 26.7 |
| BDE 99           | <i>225</i>  | <i>870</i>        | <i>208</i>  | <i>159</i>  | 51.3           | 518         | 336         | 222  |
| BDE 100          | <i>51.0</i> | <i>194</i>        | <i>32.5</i> | <i>29.2</i> | 7.92           | 353         | 145         | 72.3 |
| BDE 153          | <i>32.8</i> | <i>89.4</i>       | 19.5        | 14.1        | 5.21           | 367         | 138         | 56.1 |
| ΣPentaBDE        | 503         | 1660              | 371         | 299         | 87.4           | 1935        | 951         | 525  |
| BDE 209          | 3.40        | 13.4              | 19.5        | 0.90        | 5.21           | 1.72        | 2.50        | 41.6 |
| Firemaster 550   |             |                   |             |             |                |             |             |      |
| TBB              | 85.6        | 36.6              | 28.9        | 20.8        | 23.5           | <0.001      | <0.001      | 0.35 |
| TBPH             | 32.0        | 44.9              | 30.0        | 17.3        | 21.0           | 0.06        | <0.001      | 0.21 |
| Organophosphates |             |                   |             |             |                |             |             |      |
| TPP              | NM          | NM                | NM          | NM          | NM             | 25.0        | 20.7        | 22.9 |
| TDCPP            | 3.71        | 22.7              | 8.42        | 2.72        | 5.05           | 38.2        | 13.0        | 3.19 |
| TCPP             | 3.06        | 2.60              | 1.85        | 2.48        | 0.75           | NM          | NM          | NM   |

<sup>1</sup>Beam near uneven bars; LFP: Loose foam pit; VB: Vacuum cleaner bag; NM: Not measured  
*Italic font:* May be less exact due to extrapolation from the end of a calibration curve.

| b) Surface Wipe  | Gym 1    |               |                   |       |             |                | Gym 2       |          |
|------------------|----------|---------------|-------------------|-------|-------------|----------------|-------------|----------|
|                  | Near LFP | Away from LFP | Beam <sup>2</sup> | Vault | Uneven Bars | Floor Exercise | Median      | Near LFP |
| PBDEs            |          |               |                   |       |             |                |             |          |
| BDE 28, 83       | 0.34     | 0.33          | 0.12              | 0.01  | 0.04        | <0.001         | <b>0.08</b> | 1.05     |
| BDE 47           | 17.2     | 26.88         | 30.2              | 0.53  | 3.23        | 0.15           | <b>10.2</b> | 141      |
| BDE 85, 155      | 3.37     | 1.66          | 2.69              | 0.03  | 0.13        | 0.02           | <b>0.90</b> | 44.0     |
| BDE 99           | 42.9     | 36.05         | 38.0              | 0.76  | 2.64        | 0.36           | <b>19.3</b> | 262      |
| BDE 100          | 0.11     | 7.29          | 9.65              | 0.16  | 0.53        | 0.08           | <b>0.34</b> | 98.0     |
| BDE 153          | 6.46     | 1.81          | 4.61              | 0.06  | 0.18        | 0.03           | <b>1.00</b> | 101      |
| ΣPentaBDE        | 70.3     | 74.04         | 85.3              | 1.55  | 6.75        | 0.63           | <b>38.5</b> | 647      |
| BDE 209          | 0.23     | 1.24          | 0.02              | 0.12  | <0.02       | 0.03           | <b>0.12</b> | 1.02     |
| Firemaster 550   |          |               |                   |       |             |                |             |          |
| TBB              | 8.05     | 1.74          | 3.90              | 1.46  | 2.04        | 0.18           | <b>1.89</b> | 0.03     |
| TBPH             | 5.94     | 0.66          | 1.67              | 0.61  | 0.51        | 0.03           | <b>0.63</b> | 0.04     |
| Organophosphates |          |               |                   |       |             |                |             |          |
| TPP              | NM       | NM            | NM                | NM    | NM          | NM             | <b>NM</b>   | 15.36    |
| TDCPP            | 1.83     | <0.14         | 0.78              | <0.14 | 0.21        | 0.07           | <b>0.21</b> | 5.15     |
| TCPP             | 0.19     | 0.19          | <0.17             | <0.17 | 0.09        | 0.09           | <b>0.09</b> | NM       |

<sup>2</sup>Beam near vault runway; LFP: Loose foam pit; NM: Not measured

**Table S4.** Percentage (% , by weight) levels of bromine in gym equipment measured by XRF

| Gym Equipment       | Gym 1 |                     | Gym 2 |                     |
|---------------------|-------|---------------------|-------|---------------------|
|                     | n     | Average (Range)     | n     | Average (Range)     |
| Pit Cube            | 2     | 4.66 (3.16–6.16)    | 4     | 4.01 (0.483–5.60)   |
| Landing Mat         | 15    | 1.41 (0.005–3.61)   | 0     | NM                  |
| Sting Mat           | 7     | 0.020 (0.081–1.99)  | 1     | 0.532 (NA)          |
| Vault Runway Carpet | 2     | 0.621 (0.549–0.690) | 1     | 0.903 (NA)          |
| Vault Runway Foam   | 2     | 0.014 (0.007–0.021) | 0     | NM                  |
| Above-ground Pit    | 3     | 0.001 (0.003–0.047) | 1     | 0.017 (NA)          |
| Spring Board        | 1     | 0.005 (NA)          | 2     | 0.006 (0.002–0.010) |
| Floor Foam          | 1     | 0.003 (NA)          | 1     | 0.619 (NA)          |
| Floor Carpet        | 1     | 0.001 (NA)          | 1     | 0.036 (NA)          |

NM: not measured

NA: not applicable, only one item measured.

**Figure S1.** Percentages of PentaBDE<sup>1</sup> in the technical mixture and gymnast serum

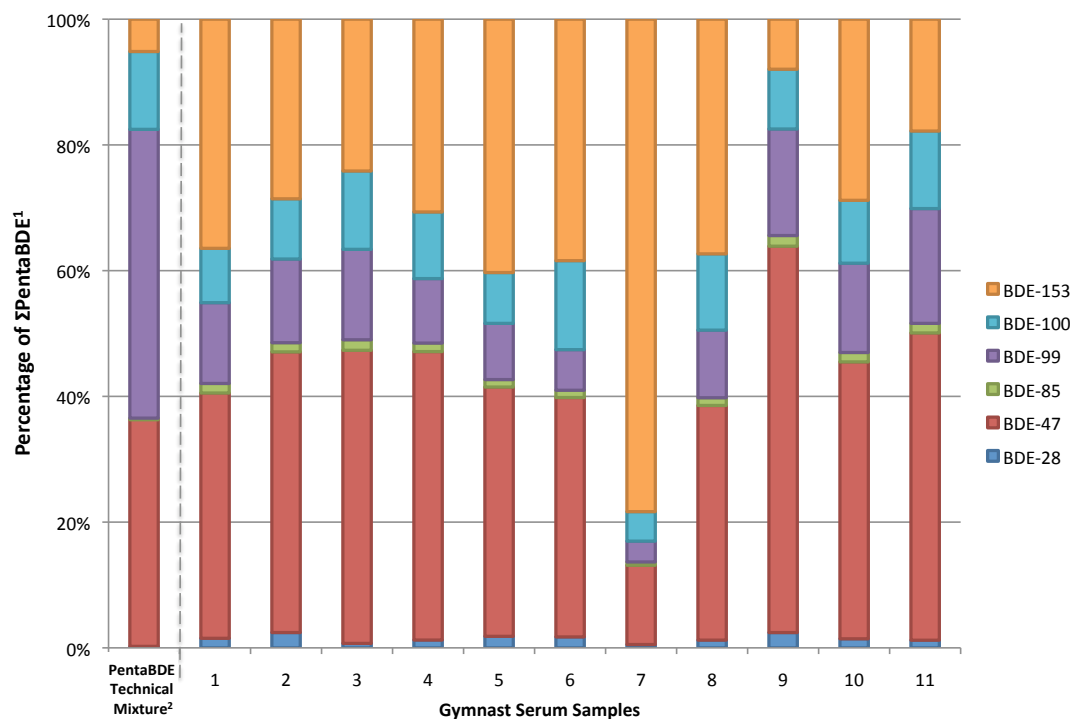

<sup>1</sup>ΣPentaBDE includes BDEs 28, 47, 85, 99, 100 and 153.

<sup>2</sup>The U.S. Penta mixture DE-71 as reported by Laguardia et al. (2006).

**Figure S2:** Percent levels of bromine (by weight) in pit cubes as measured by GC/ECNI-MS and XRF ( $r_p=0.94$ )

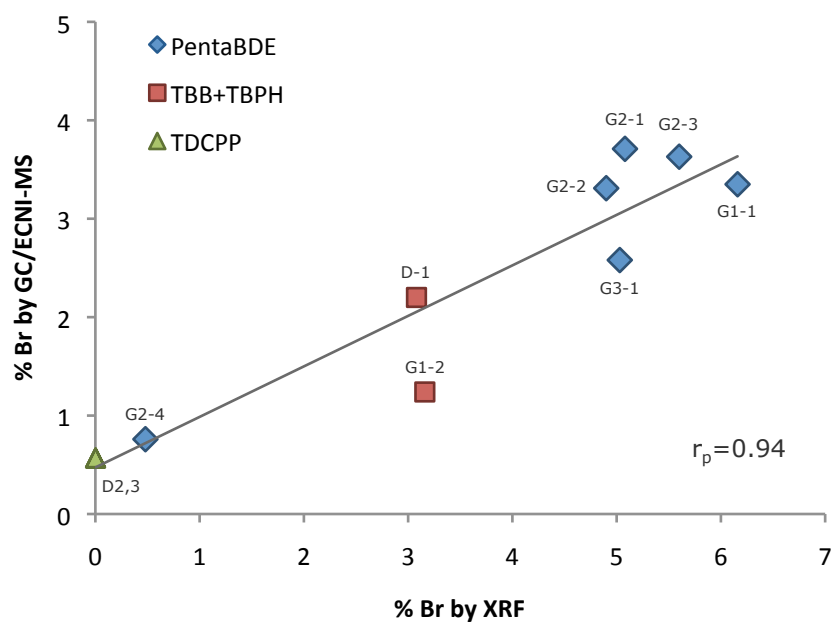

## References

Stapleton, H. M.; Kelly, S. M.; Allen, J. G.; McClean, M. D.; Webster, T. F., Measurement of polybrominated diphenyl ethers on hand wipes: estimating exposure from hand-to-mouth contact. *Environ. Sci. Technol.* **2008**, *42*, (9), 3329-3334.

La Guardia, M. J.; Hale, R. C.; Harvey, E., Detailed polybrominated diphenyl ether (PBDE) congener composition of the widely used penta-, octa-, and deca-PBDE technical flame-retardant mixtures. *Environ. Sci. Technol.* **2006**, *40*, (20), 6247-6254.
